# Supplementary material for: Mice Lacking the Calcitonin Receptor Do Not Display Improved Bone Healing
Source: MDPI journal article supplement (doi:10.3390/cells10092304), 2021-09-03
Supplement: s1 [file s1]

Supplementary materials:

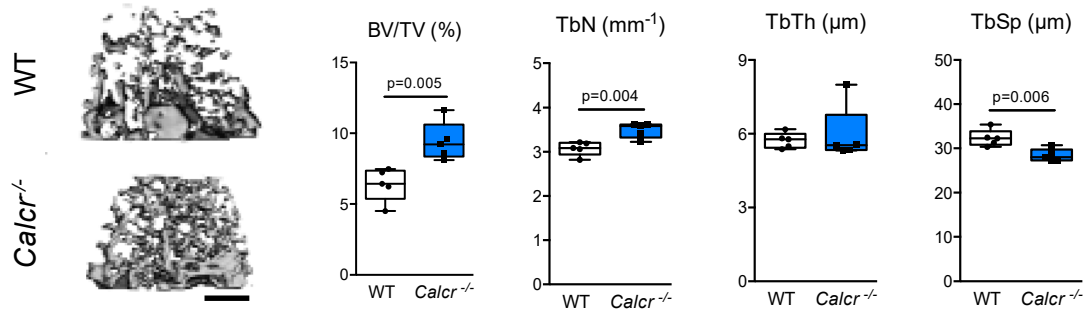

**Supplementary Figure S1. High bone mass in the distal femur of mice lacking CTR.** Representative  $\mu$ CT images of the trabecular bone in the distal shaft area of the femur derived from untreated WT and CTR-deficient (*Calcr*<sup>-/-</sup>) mice at the age of 14 weeks (left; scale bar = 500  $\mu$ m.), and radiologic quantification of indicated bone parameters (right). n = 5 mice per group.
